# Supplementary material for: A study of the transport and immobilisation mechanisms of human red blood cells in a paper-based blood typing device using confocal microscopy
Source: Royal Society of Chemistry journal article supplement (doi:10.1039/c3an00810j), 2013-01-01
Supplement: c3an00810j.pdf [file c3an00810j.pdf]

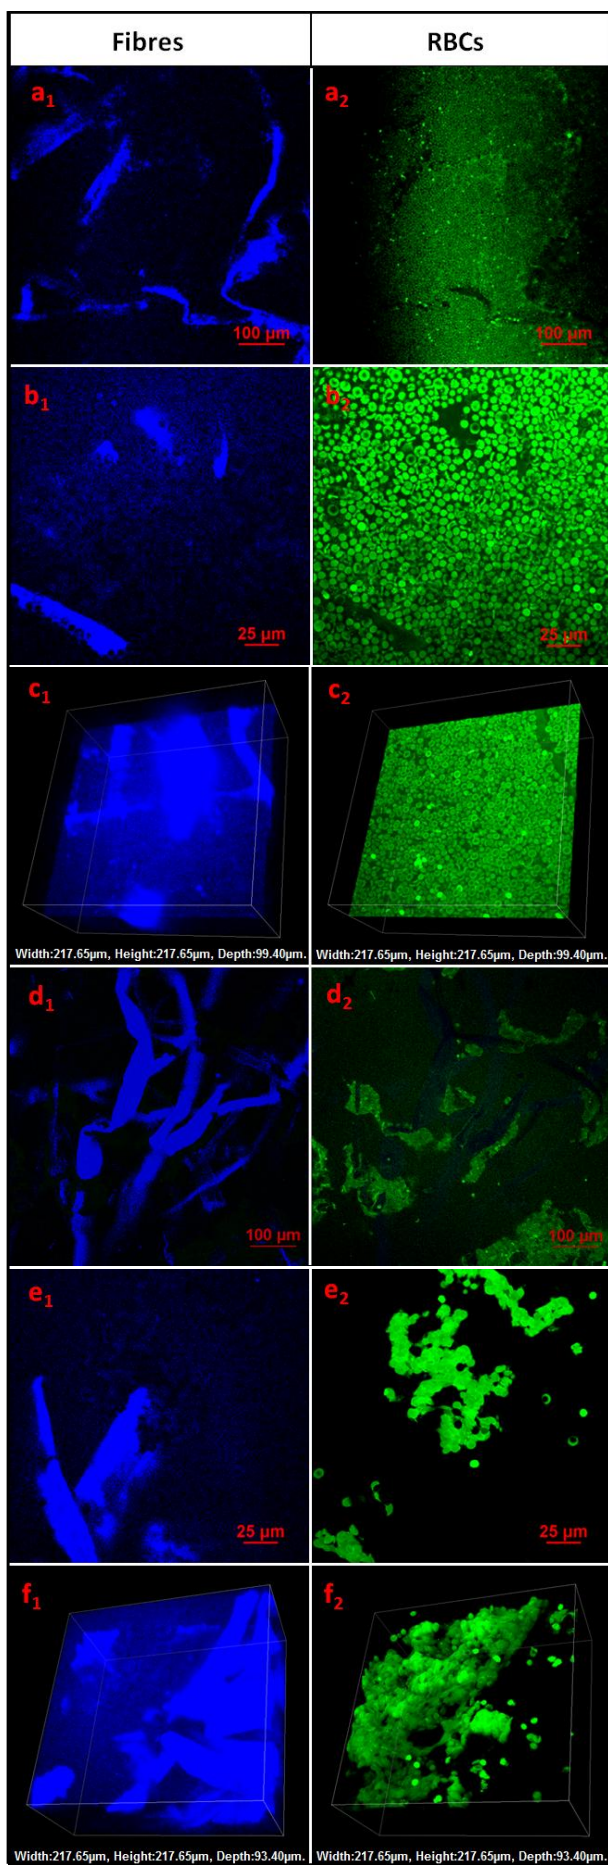

**Fig. S1** Separated confocal signals of fibres and RBCs for Fig. 4.

For example, Figs. S1a<sub>1</sub> and a<sub>2</sub> are fibre and RBC signals for Fig. 4a respectively, and etc.
